# Supplementary material for: Untargeted metabolomics-based network pharmacology reveals fermented brown rice towards anti-obesity efficacy
Source: PubMed Central journal article supplement (PMC10981755; doi:10.1038/s41538-024-00258-x), 2024-03-30
Supplement: 41538_2024_258_MOESM1_ESM.pdf [file 41538_2024_258_MOESM1_ESM.pdf]

**Supplementary Tables and Figures for**  
**Untargeted Metabolomics-Based Network Pharmacology Reveals**  
**Fermented Brown Rice Towards Anti-Obesity Efficacy**

Kaliyan Barathikannan <sup>1,3</sup>, Ramachandran Chelliah <sup>2,7</sup>, Annadurai Vinothkanna <sup>4,5</sup>, Ragothaman Prathiviraj <sup>6</sup>, Akanksha Tyagi <sup>2</sup>, Selvakumar Vijayalakshmi <sup>2</sup>, Min-Jin Lim <sup>2</sup>, Ai-Qun Jia <sup>5</sup>, Deog-Hwan Oh <sup>2\*</sup>.

1. Agricultural and Life Science Research Institute, Kangwon National University, Chuncheon 24341, Korea.

2. Department of Food Science and Biotechnology, College of Agriculture and Life Sciences, Kangwon National University, Chuncheon 200-701, South Korea.

3. Saveetha School of Engineering, Saveetha (SIMATS) University, Tamil Nadu, 600124, India.

4. School of Life Sciences, Hainan University, Haikou, 570228, China.

5. Hainan General Hospital, Hainan Affiliated Hospital of Hainan Medical University, Haikou 570311, China.

6. Department of Microbiology, Pondicherry University, Puducherry 605014, India.

7. Kangwon Institute of Inclusive Technology (KIIT), Kangwon National University, Chuncheon 24341, South Korea.

\* Corresponding author

Supplementary Table 1. Metabolites Identified in FBR 1708 by UHPLC-Q-TOF-MS<sup>2</sup>. RT: Retention time.

| S.No. | RT<br>(min) | Tentative<br>Compounds  | Molecular<br>Formula                                          | Precursor<br>Mass | Found at<br>mass | Area     | Adduct/<br>charge |
|-------|-------------|-------------------------|---------------------------------------------------------------|-------------------|------------------|----------|-------------------|
| 1.    | 16.2        | Ferulic acid            | C <sub>10</sub> H <sub>10</sub> O <sub>4</sub>                | 194.2800          | 194.0511         | 4.90E+04 | [M-H]-            |
| 2.    | 6.44        | 4-Hydroxybenzoic acid   | C <sub>7</sub> H <sub>6</sub> O <sub>3</sub>                  | 138.03246         | 137.0249         | 2.00E+05 | [M-H]-            |
| 3.    | 14.16       | Cinnamic acid           | C <sub>9</sub> H <sub>8</sub> O <sub>2</sub>                  | 148.05308         | 147.0457         | 3.30E+06 | [M-H]-            |
| 4.    | 11.7        | Protocatechuic acid     | C <sub>7</sub> H <sub>6</sub> O <sub>4</sub>                  | 154.02694         | 153.0198         | 9.90E+05 | [M-H]-            |
| 5.    | 6.17        | p-Coumaric acid         | C <sub>9</sub> H <sub>8</sub> O <sub>3</sub>                  | 164.04775         | 163.0406         | 4.80E+04 | [M-H]-            |
| 6.    | 14.16       | Ethyl 4-hydroxybenzoate | C <sub>9</sub> H <sub>10</sub> O <sub>3</sub>                 | 166.06345         | 165.0559         | 8.10E+06 | [M-H]-            |
| 7.    | 3.27        | Norcantharidin          | C <sub>8</sub> H <sub>8</sub> O <sub>4</sub>                  | 168.04246         | 167.0351         | 3.40E+06 | [M-H]-            |
| 8.    | 10.59       | Caffeic acid            | C <sub>9</sub> H <sub>8</sub> O <sub>4</sub>                  | 180.04288         | 179.0354         | 7.00E+04 | [M-H]-            |
| 9.    | 6.18        | Homovanillic acid       | C <sub>9</sub> H <sub>10</sub> O <sub>4</sub>                 | 182.05830         | 181.0511         | 3.20E+06 | [M-H]-            |
| 10.   | 20.01       | Butylparaben            | C <sub>11</sub> H <sub>14</sub> O <sub>3</sub>                | 194.09510         | 193.0874         | 3.50E+05 | [M-H]-            |
| 11.   | 4.98        | L-Tryptophan            | C <sub>11</sub> H <sub>12</sub> N <sub>2</sub> O <sub>2</sub> | 204.09051         | 203.083          | 7.70E+02 | [M-H]-            |
| 12.   | 18.84       | Quercetin               | C <sub>15</sub> H <sub>10</sub> O <sub>7</sub>                | 302.04249         | 301.0352         | 2.70E+06 | [M-H]-            |
| 13.   | 19.65       | Isorhamnetin            | C <sub>16</sub> H <sub>12</sub> O <sub>7</sub>                | 316.05840         | 315.0513         | 1.10E+06 | [M-H]-            |
| 14.   | 17.19       | Sophoricoside           | C <sub>21</sub> H <sub>20</sub> O <sub>10</sub>               | 432.10629         | 431.099          | 1.90E+05 | [M-H]-            |

Supplementary Table 2. Representation of molecular properties from traditional Chinese medicine systems pharmacology database and analysis platform for the Metabolites Identified in MNL5 fermented brown rice (1741).

| S.No. | RT<br>(min) | Tentative<br>Compounds  | Molecular<br>Formula                                          | OB%   | BBB   | DL   | HL    |
|-------|-------------|-------------------------|---------------------------------------------------------------|-------|-------|------|-------|
| 1.    | 16.12       | Ferulic acid            | C <sub>10</sub> H <sub>10</sub> O <sub>4</sub>                | 39.56 | -0.03 | 0.06 | 2.38  |
| 2.    | 14.16       | Cinnamic acid           | C <sub>9</sub> H <sub>8</sub> O <sub>2</sub>                  | 19.68 | 0.96  | 0.03 | -     |
| 3.    | 11.7        | Protocatechuic acid     | C <sub>7</sub> H <sub>6</sub> O <sub>4</sub>                  | 25.37 | -0.17 | 0.04 | -     |
| 4.    | 6.17        | p-Coumaric acid         | C <sub>9</sub> H <sub>8</sub> O <sub>3</sub>                  | 43.29 | 0.13  | 0.04 | 4.43  |
| 5.    | 14.16       | Ethyl 4-hydroxybenzoate | C <sub>9</sub> H <sub>10</sub> O <sub>3</sub>                 | 64.98 | 0.68  | 0.04 | 4.50  |
| 6.    | 10.59       | Caffeic acid            | C <sub>9</sub> H <sub>8</sub> O <sub>4</sub>                  | 54.97 | 0.11  | 0.05 | 1.63  |
| 7.    | 6.18        | Homovanillic acid       | C <sub>9</sub> H <sub>10</sub> O <sub>4</sub>                 | 35.47 | 0.09  | 0.04 | 11.62 |
| 8.    | 20.01       | Butylparaben            | C <sub>11</sub> H <sub>14</sub> O <sub>3</sub>                | 64.98 | 0.68  | 0.04 | 4.50  |
| 9.    | 4.98        | Gallic Acid             | C <sub>11</sub> H <sub>12</sub> N <sub>2</sub> O <sub>2</sub> | 31.69 | -0.54 | 0.04 | 11.78 |
| 10.   | 18.84       | Quercetin               | C <sub>15</sub> H <sub>10</sub> O <sub>7</sub>                | 46.43 | -0.77 | 0.28 | 14.40 |
| 11.   | 19.65       | Isorhamnetin            | C <sub>16</sub> H <sub>12</sub> O <sub>7</sub>                | 49.60 | -0.54 | 0.31 | 14.34 |
| 12.   | 17.19       | Sophoricoside           | C <sub>21</sub> H <sub>20</sub> O <sub>10</sub>               | 10.42 | -2.22 | 0.78 | -     |
| 13.   | 3.44        | Phenprobamate           | C <sub>9</sub> H <sub>11</sub> NO <sub>2</sub>                | 2.42  | 0.94  | 0.04 | -     |
| 14.   | 16.43       | Daphnetin               | C <sub>9</sub> H <sub>6</sub> O <sub>4</sub>                  | 24.23 | 0.28  | 0.07 | -     |
| 15.   | 15.00       | Cantharidin             | C <sub>10</sub> H <sub>12</sub> O <sub>4</sub>                | 51.23 | 0.15  | 0.10 | 13.50 |
| 16.   | 15.77       | Genipin                 | C <sub>11</sub> H <sub>14</sub> O <sub>5</sub>                | 26.06 | -0.98 | 0.10 | -     |
| 17.   | 6.19        | Irisflorentin           | C <sub>20</sub> H <sub>18</sub> O <sub>8</sub>                | 12.52 | -0.04 | 0.64 | -     |

Supplementary Table 3. Molecular docking analysis of disease-associated hub genes against the potential FBR-1741 metabolites.

| Receptor | Ligands             | Binging Score | Hydrogen bond interaction                    |                                  |
|----------|---------------------|---------------|----------------------------------------------|----------------------------------|
|          |                     |               | Amino acid Residues                          | Distance A°                      |
| VEGFA    | Ferulic acid        | -6.9          | B:ASP323<br>B:ILE418                         | 2.315<br>2.970                   |
|          | Quercetin           | -8.4          | B:ASP323<br>B:ASP301                         | 2.242<br>2.507                   |
|          | Isorhamnetin        | -8.5          | C:TYR357<br>C:HIS415<br>B:TYR299<br>B:ILE418 | 2.243<br>2.059<br>2.918<br>2.406 |
|          | Protocatechuic acid | -6.4          | C:TRP304<br>C:ASP323                         | 2.622<br>2.991                   |
|          | Irisflorentin       | -7.4          | B:ASN380<br>D:GLN353<br>D:ARG421             | 1.911<br>2.324<br>2.222          |
|          |                     |               |                                              |                                  |
| AKT      | Ferulic acid        | -4.9          | A:ARG15<br>A:THR87                           | 2.127<br>2.409                   |
|          | Quercetin           | -6.8          | A:ARG86<br>A:THR87                           | 2.429<br>2.134                   |
|          | Isorhamnetin        | -6.5          | A:ARG86<br>A:GLU17                           | 2.410<br>2.482                   |
|          | Protocatechuic acid | -4.7          | A:ARG41                                      | 2.316                            |
|          | Irisflorentin       | -5.8          | A:ARG15<br>A:ARG86                           | 2.326<br>2.443                   |
|          |                     |               |                                              |                                  |
| JUN      | Ferulic acid        | -4.5          | B:ARG9<br>B:ARG15                            | 2.369<br>2.175                   |
|          | Quercetin           | -5.2          | B:SER19<br>B:LEU26                           | 2.306<br>2.978                   |
|          | Isorhamnetin        | -5.3          | B:SER19                                      | 2.418                            |
|          | Protocatechuic acid | -4.4          | B:ARG11<br>B:ARG15<br>B:GLU8<br>B:GLU8       | 2.419<br>2.053<br>1.940<br>2.372 |
|          | Irisflorentin       | -5.1          | B:ARG15<br>B:ARG22                           | 1.872<br>2.371                   |
|          |                     |               |                                              |                                  |
| IL6      | Ferulic acid        | -5.6          | -                                            | -                                |
|          | Quercetin           | -7.2          | A:ARG169                                     | 2.544                            |

|      |                     |      |                                                          |                                           |
|------|---------------------|------|----------------------------------------------------------|-------------------------------------------|
|      |                     |      | A:MET68<br>A:GLU173                                      | 2.304<br>2.758                            |
|      | Isorhamnetin        | -7.1 | A:ARG169<br>A:MET68<br>A:LEU63<br>A:ASN62                | 2.496<br>2.550<br>2.169<br>2.657          |
|      | Protocatechuic acid | -5.1 | A:ARG105<br>A:ARG105<br>A:SER48                          | 2.067<br>2.605<br>2.445                   |
|      | Irisflorentin       | -6.3 | A:LYS67<br>A:MET68<br>A:MET68<br>A:SER170                | 2.243<br>2.258<br>2.321<br>2.174          |
|      |                     |      |                                                          |                                           |
| MMP9 | Ferulic acid        | -7.0 | A:PRO421                                                 | 1.873                                     |
|      | Quercetin           | -8.0 | A:HIS405                                                 | 2.300                                     |
|      | Isorhamnetin        | -7.9 | A:ARG51                                                  | 3.007                                     |
|      | Protocatechuic acid | -7.1 | A:THR426<br>A:ARG424<br>A:LEU418<br>A:TYR420<br>A:TYR420 | 2.963<br>1.855<br>2.728<br>2.086<br>2.340 |
|      | Irisflorentin       | -7.2 | -                                                        | -                                         |

Supplementary Table 4. *Caenorhabditis elegans* primers for detection of gene expression

| Gene name     | Forward primer            | Reverse primer            |
|---------------|---------------------------|---------------------------|
| <b>Fat-4</b>  | TGGAGGTTTCCTGCTCTCTCA     | TGGTAAACCATTTGCTGCTGC     |
| <b>Fat-5</b>  | CAACTACCATCACACCTTCC      | CCCGTTCAGTTTCACAGCC       |
| <b>Fat-6</b>  | CAACTTCCATCACACATTCCC     | TCCTCGTTGAATATCACATCC     |
| <b>Fat-7</b>  | TTTCCACCACACATTCCCAC      | TCTTCACTTCCGTGATTGGC      |
| <b>Spb-1</b>  | GGCGGCGAAGATTGTGATTC      | CGCTCGGTTTTTGGTCTTCCG     |
| <b>Daf-16</b> | CCAGACGGAAGGCTTAAACT      | ATTCGCATGAAACGAGAATG      |
| <b>Hosl-1</b> | DNAAAAGGCAACTTC-AGGACCACT | DNAGTCCGAACACATCTGTACCAAC |

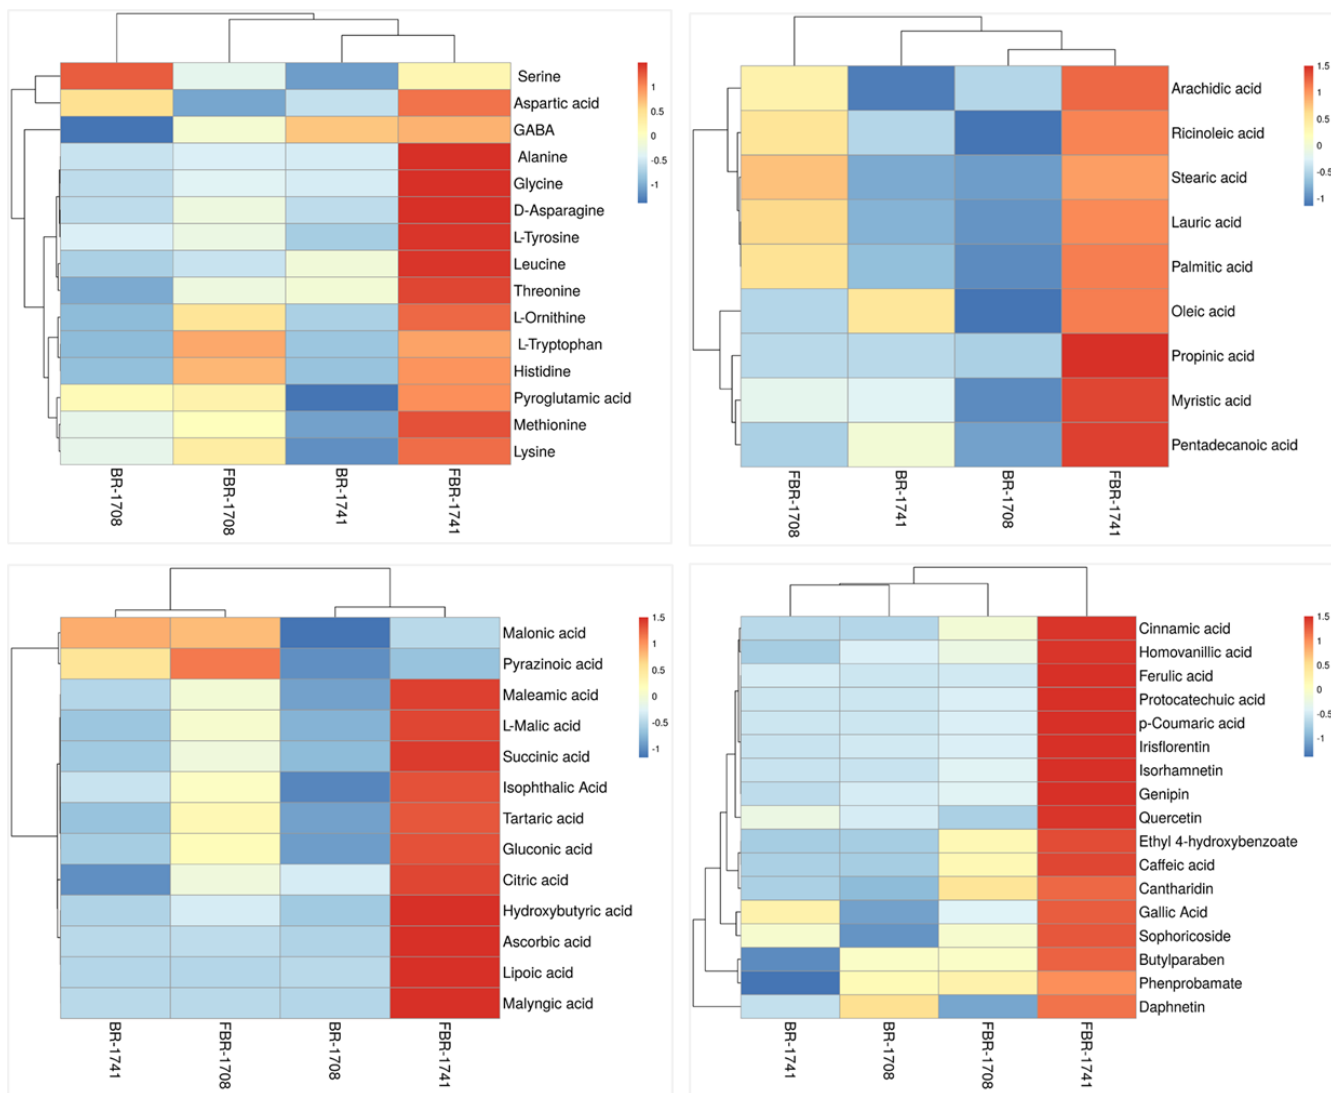

Supplementary Figure 1. Heat map plot showing the profile of Raw BR and FBR samples (1708 & 1741) (a) Levels of Amino acids; (b) Levels of Fatty acids; (c) Levels of Organic Acids; (d) Levels of phenolic compounds.

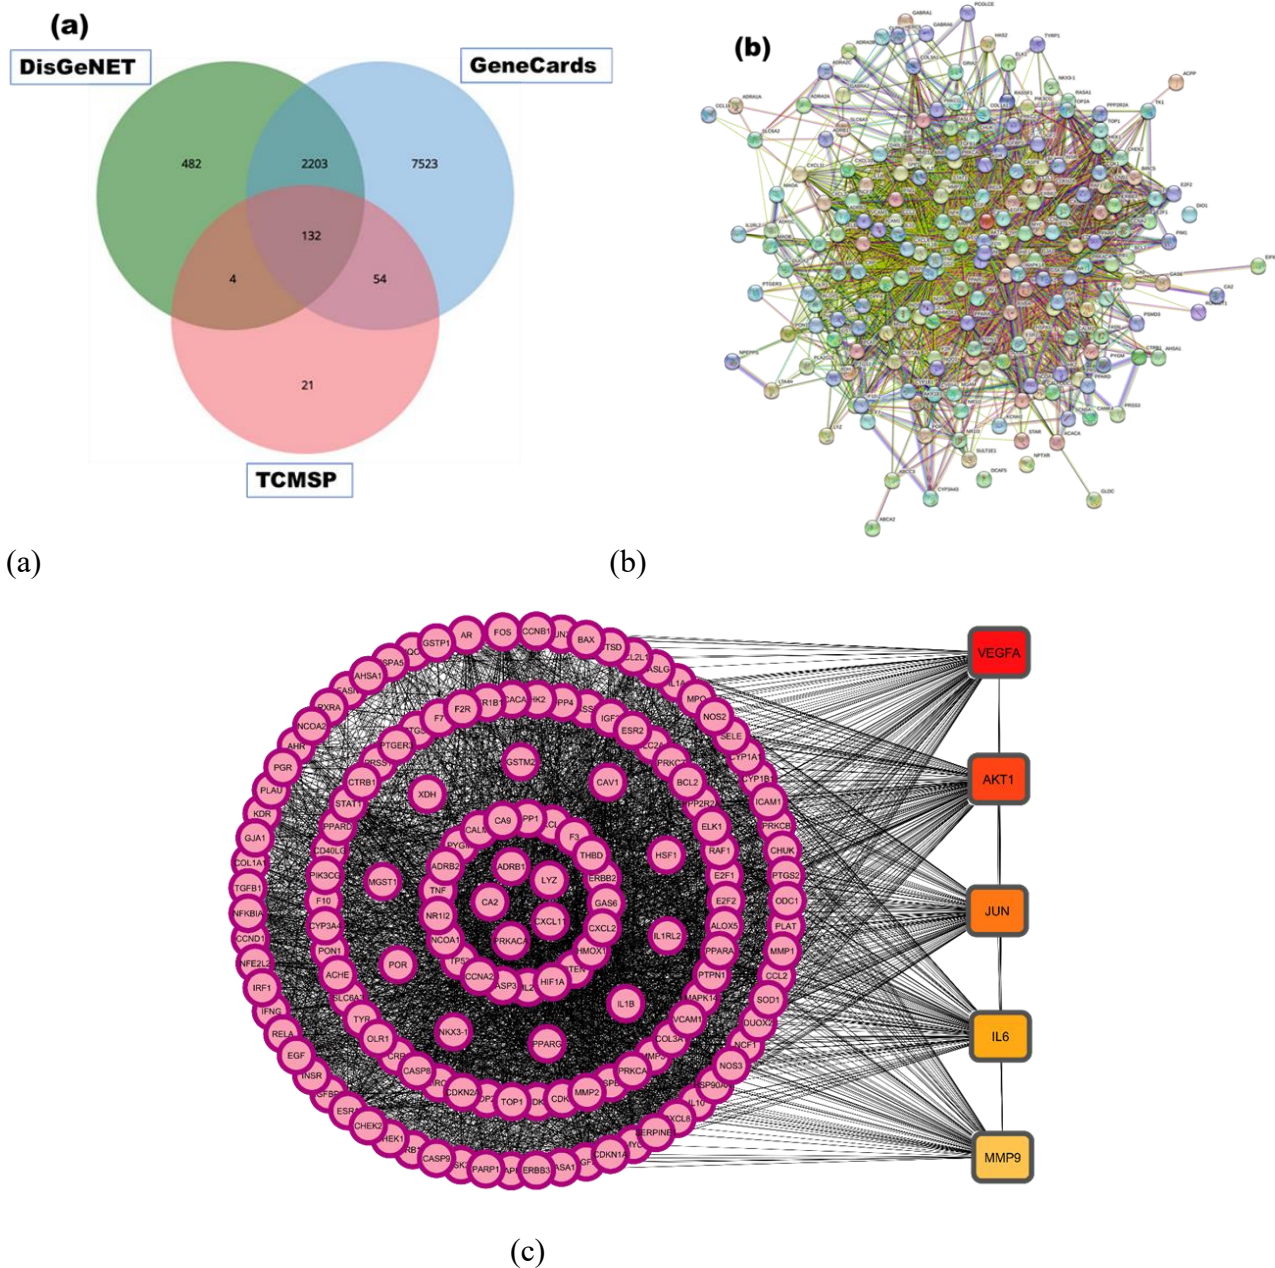

Supplementary Figure 2. (a) Venn diagram for comparing target receptors (132 genes) with fermented brown rice ingredients retrieved from TCMSP. DisGeNET and GeneCards databases: Genes associated with obesity-related diseases; (b) The enriched protein–protein interaction network analysis of genes encoding target receptors of obesity-related diseases. The enrichment of p-value is  $p < 1.0e-16$ ; (c) Identification of top ten hub genes from the obesity-related disease genes interaction networks.

5DN2\_VEGF-A VS 170569

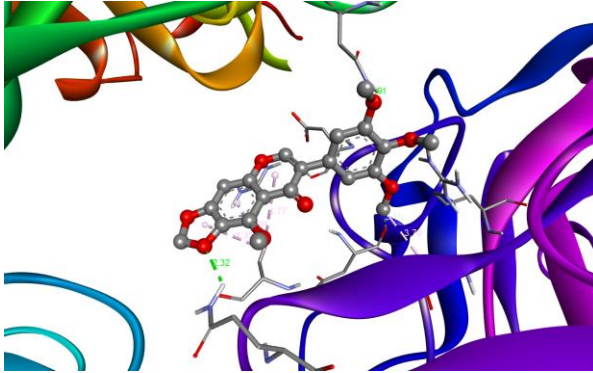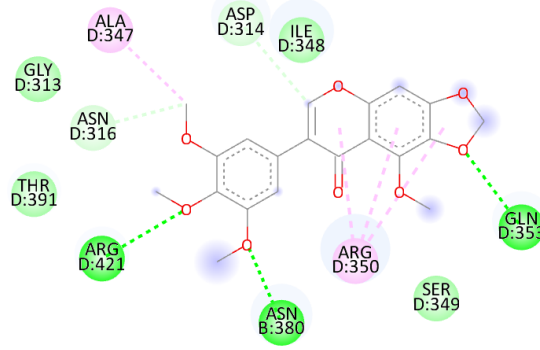

5DN2\_VEGF-A VS 445858

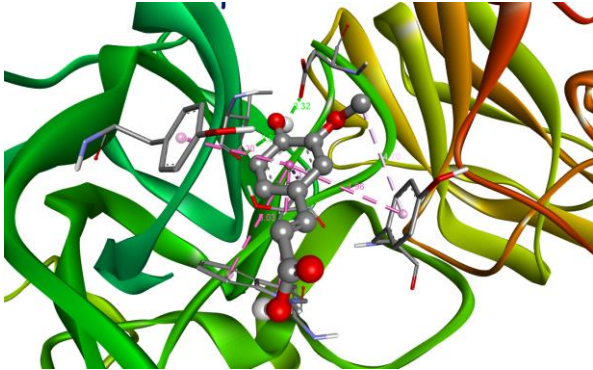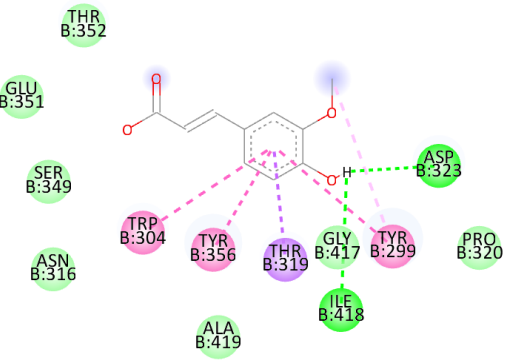

5DN2\_VEGF-A VS 5280343

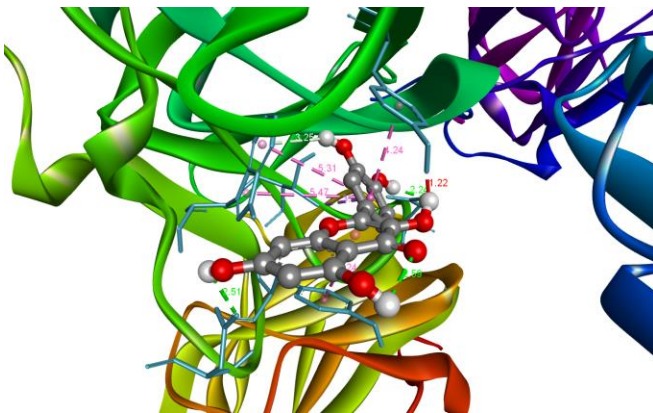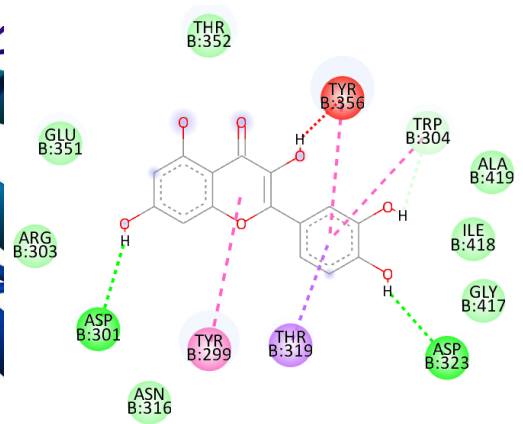



5DN2\_VEGF-A VS 5281654

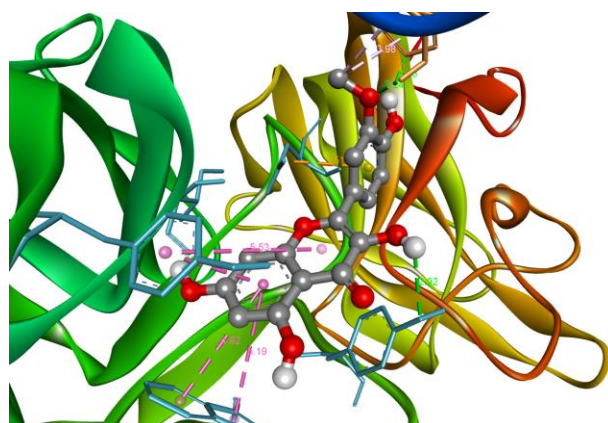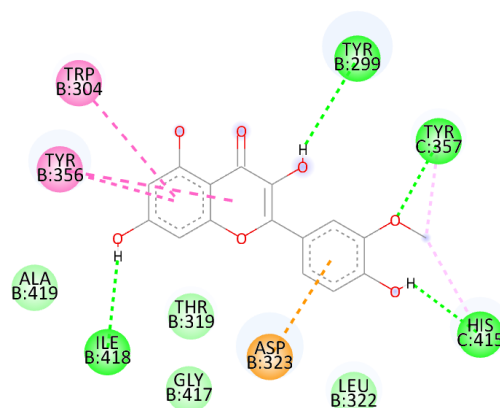

5DN2\_VEGF-A VS 72

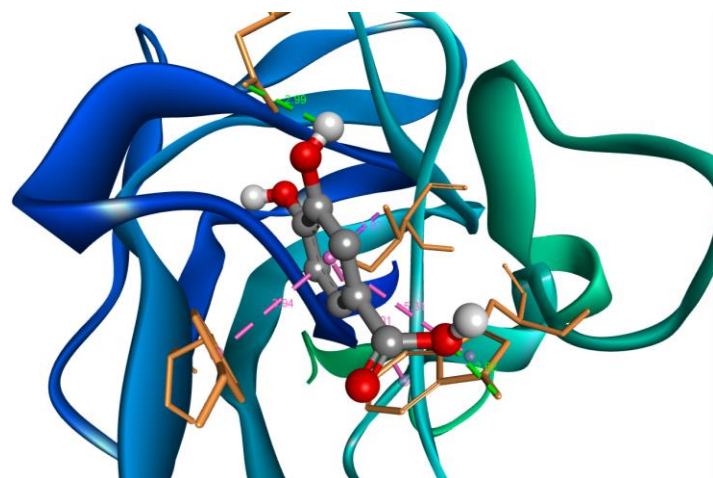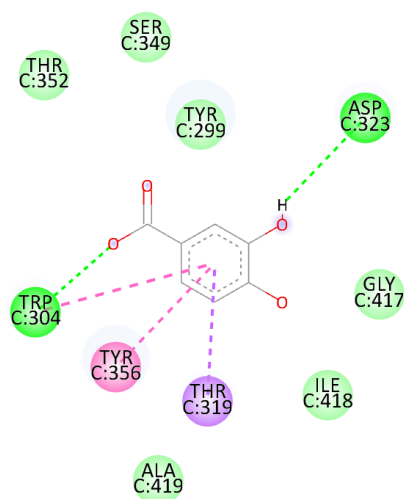

Supplementary Figure 3. Two-Dimensional and three-Dimensional view of hydrogen and hydrophobic bonds interaction of selected top hit hub proteins (based on sub-network) docked with FBR-1741 variety guided by network pharmacology analysis top correlated metabolites (ferulic acid, quercetin, isorhamnetin, protocatechuic acid, and irisflorentin). Note: The legend of the 2D interaction view shows that dark green represents conventional hydrogen bonds, milky green represents hydrophobic interactions, and Pink represents Pi-Alkyl group interacting residues.

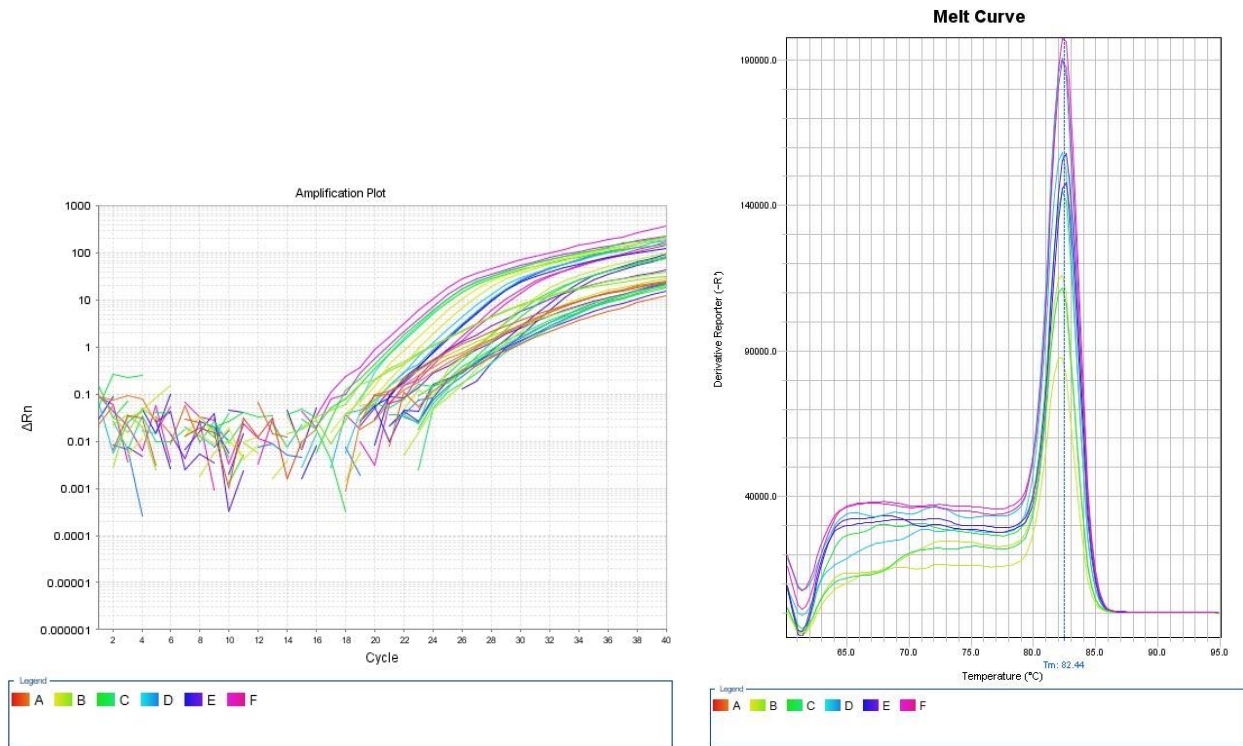

(a)

(b)

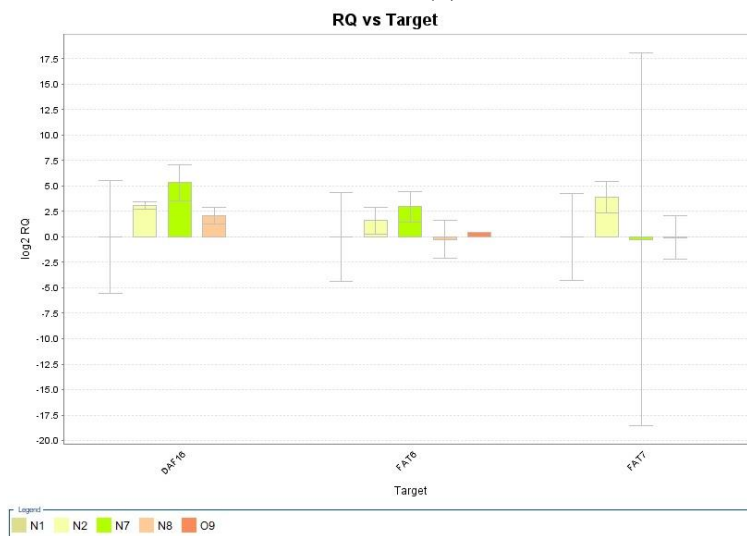

(c)

Supplementary Figure 4. The FBR-1741 and metabolites treatments using qPCR method; (a) Amplification plot; (b) Melt curve peaks for detecting fat genes in *C. elegans* models; (c) Plots of logarithmic RQ values showing the time-course of the expression of fat genes for FBR and metabolite treatments.

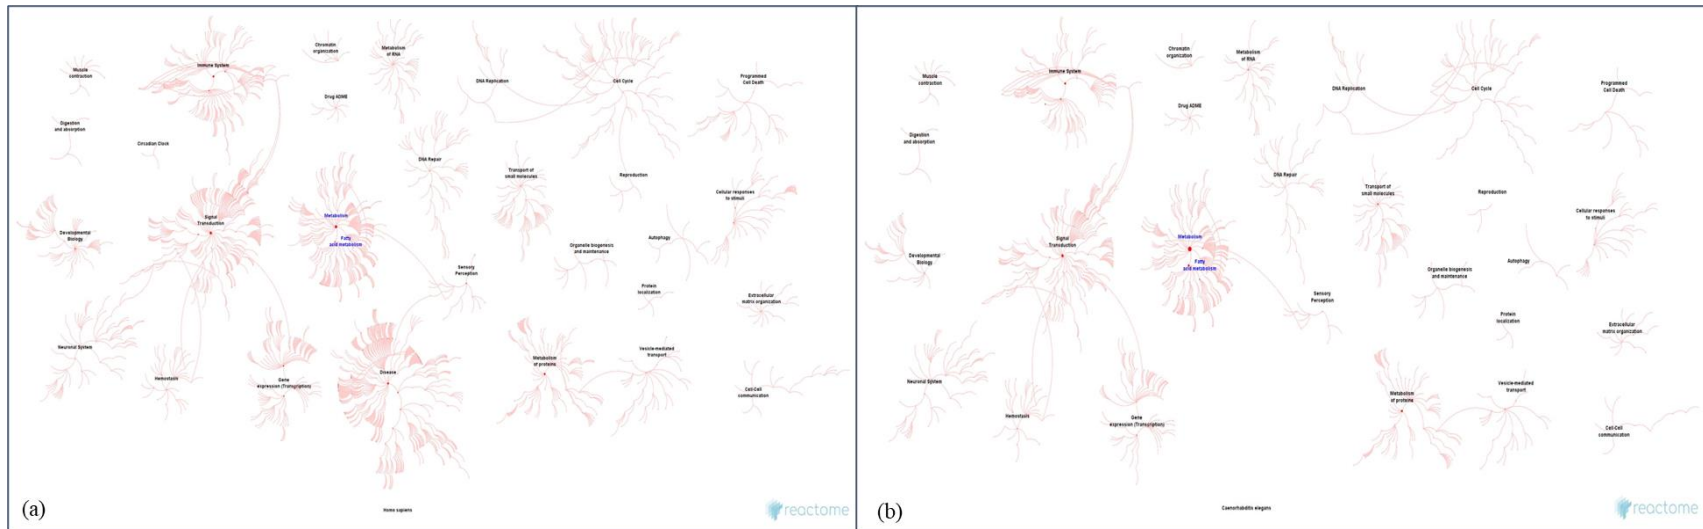

Supplementary Figure 5. Fat synthesis and breakdown processes are controlled by Dietary polyphenols; such can be recognized in fermented brown rice. The pathways show similarity to the animal model used in our study. a), Human metabolic pathway; b) *C. elegans* metabolic Pathways; Processes annotated in this module include the synthesis of fatty acids from acetyl-CoA, mitochondrial and peroxisomal breakdown of fatty acids, and the metabolism of eicosanoids and related molecules.

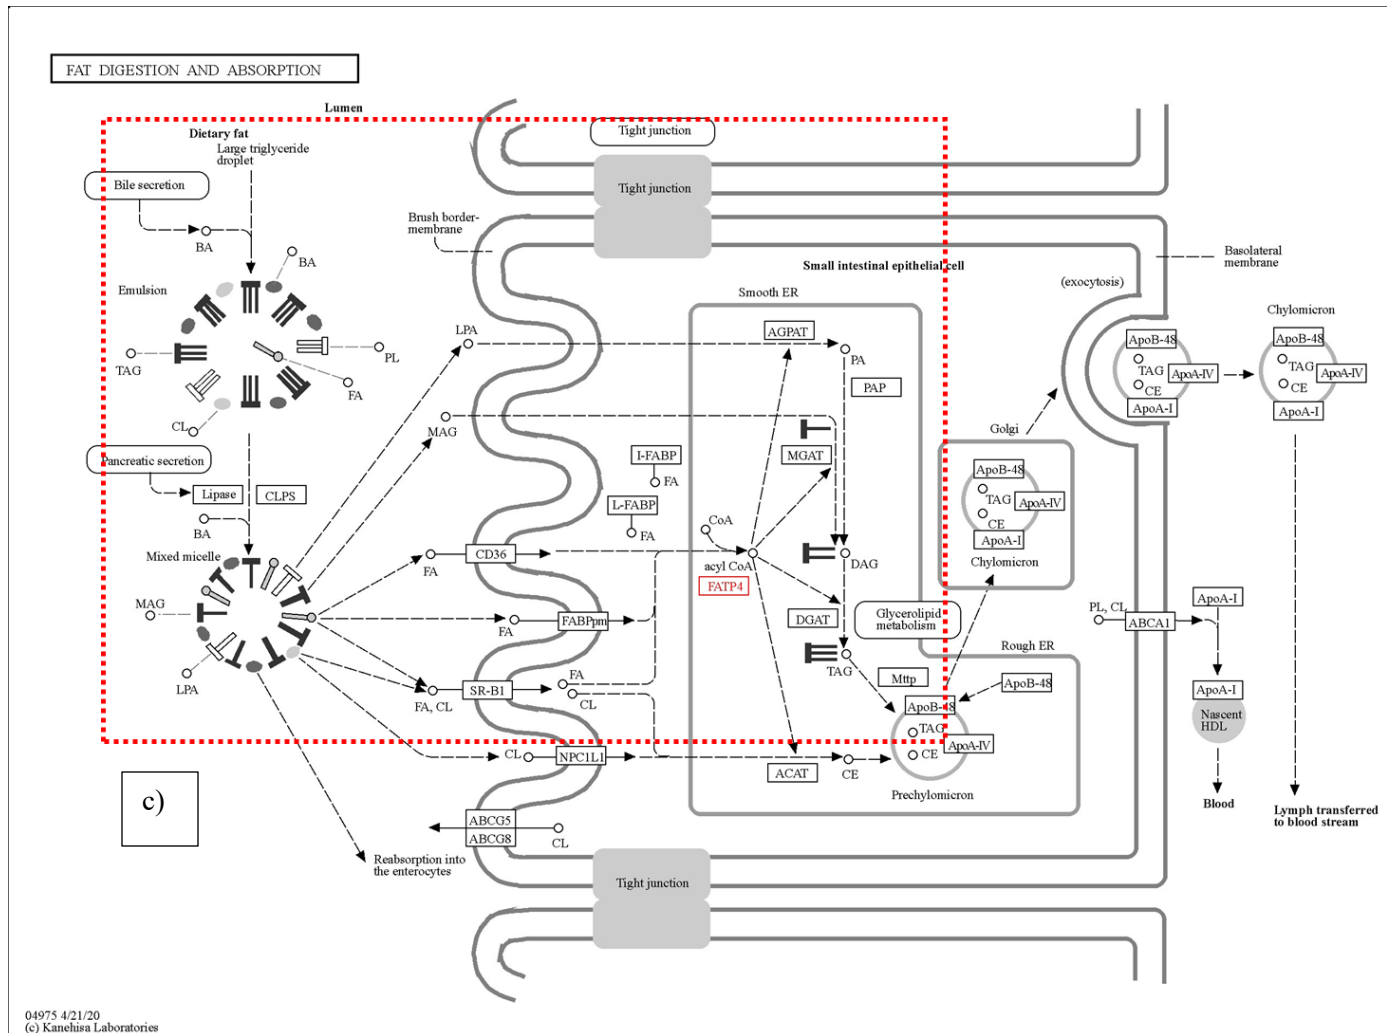

Supplementary Figure 5c. Fat is an important energy source from food. More than 95% of dietary fat is long chain triacylglycerols (TAG), the remaining being phospholipids (4.5%) and sterols. In the small intestine lumen, dietary TAG is hydrolyzed to fatty acids (FA) and monoacylglycerols (MAG) by pancreatic lipase.

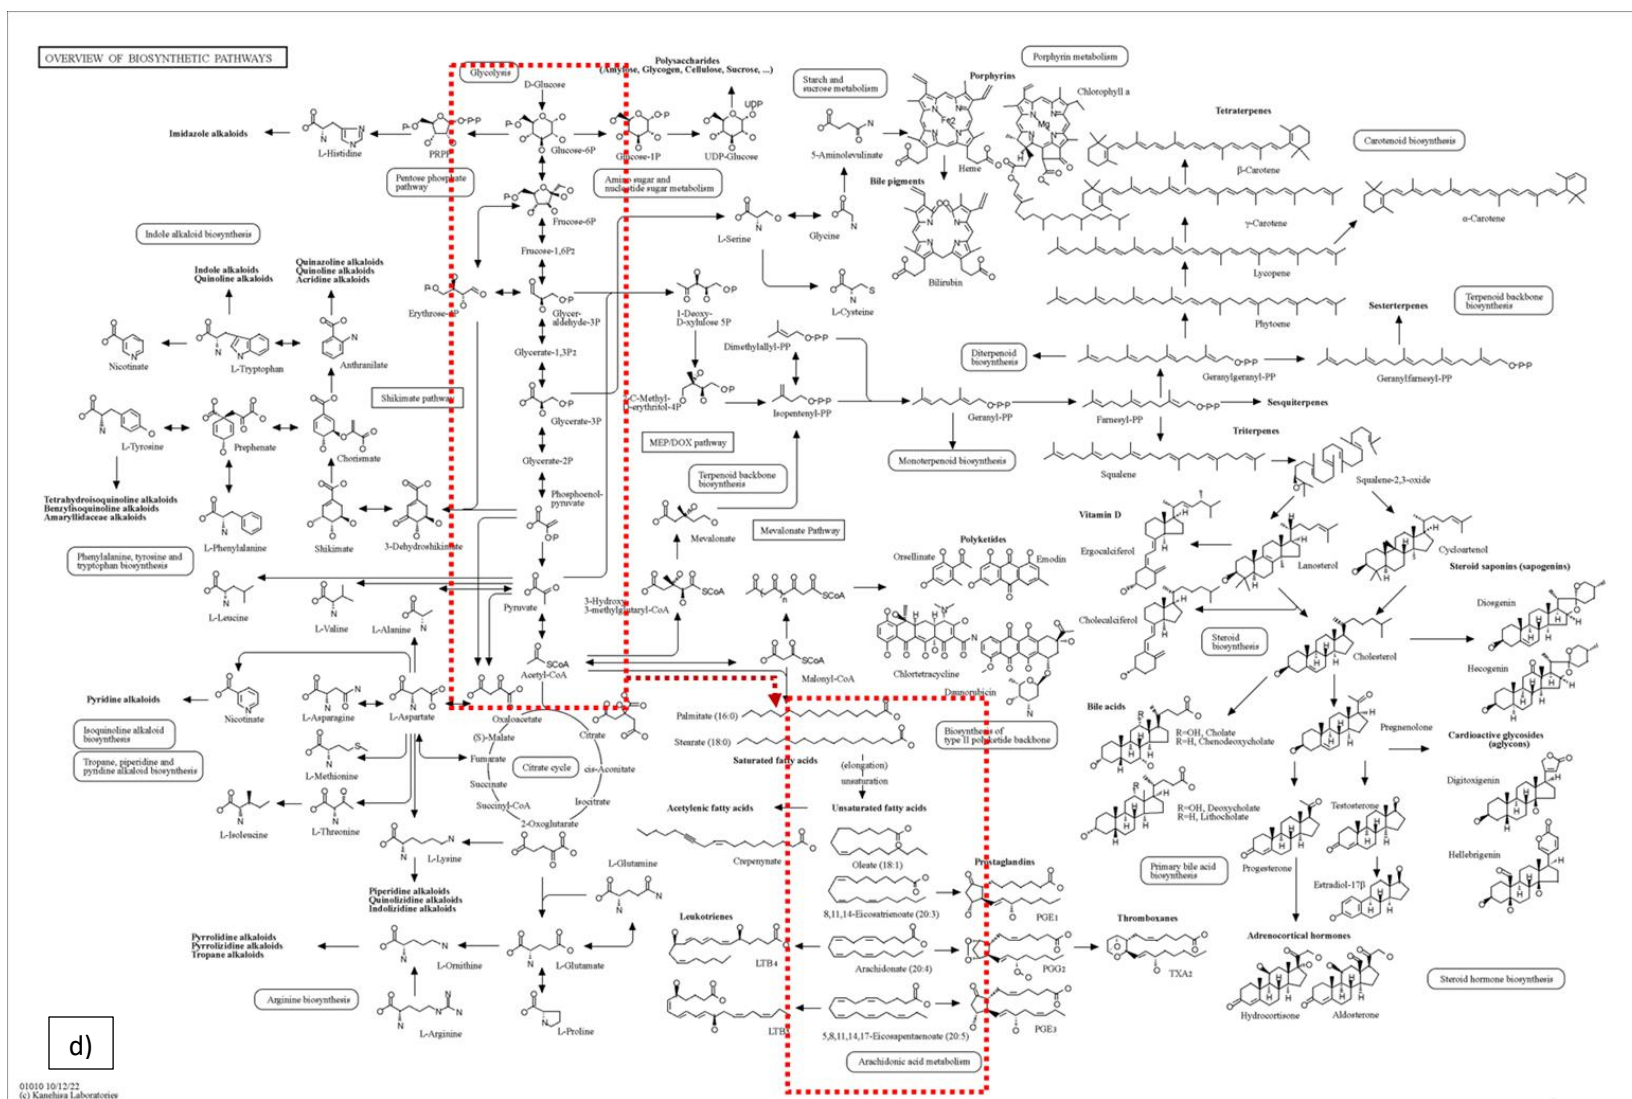

Supplementary Figure 5d. Overview of Biosynthesis Pathway. The red color dotted box indicates the formation and degradation of PUFA.



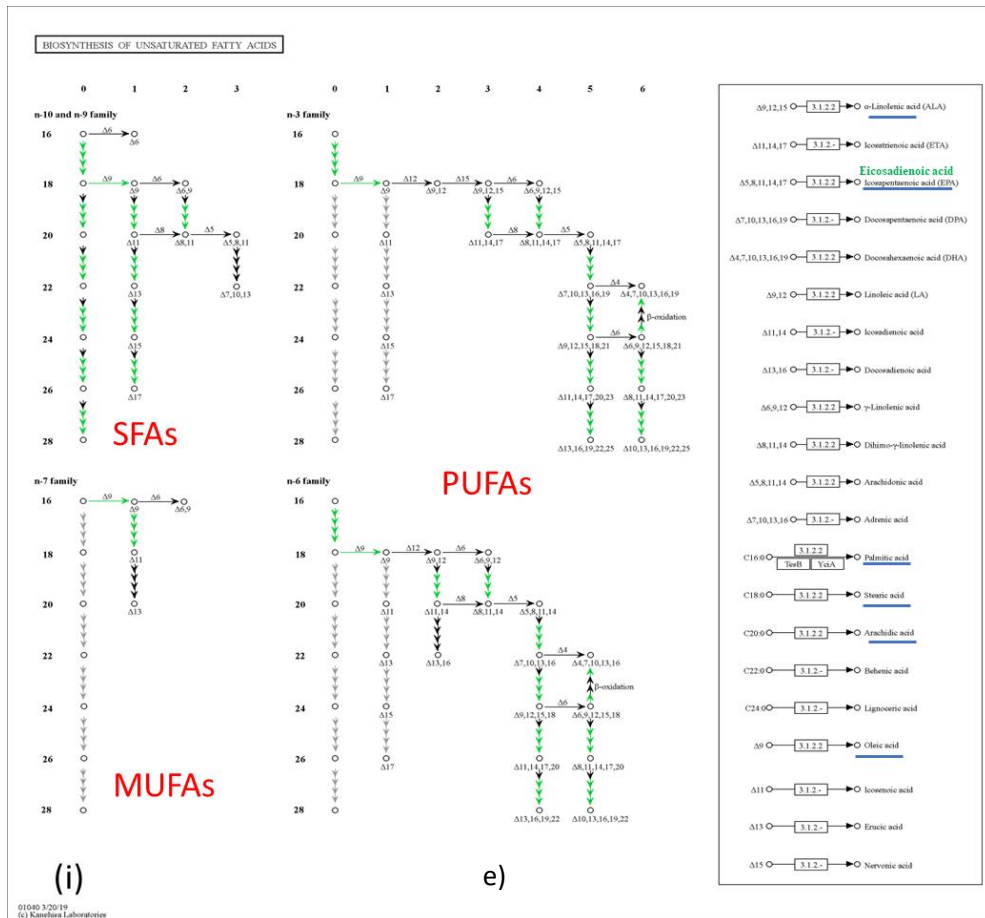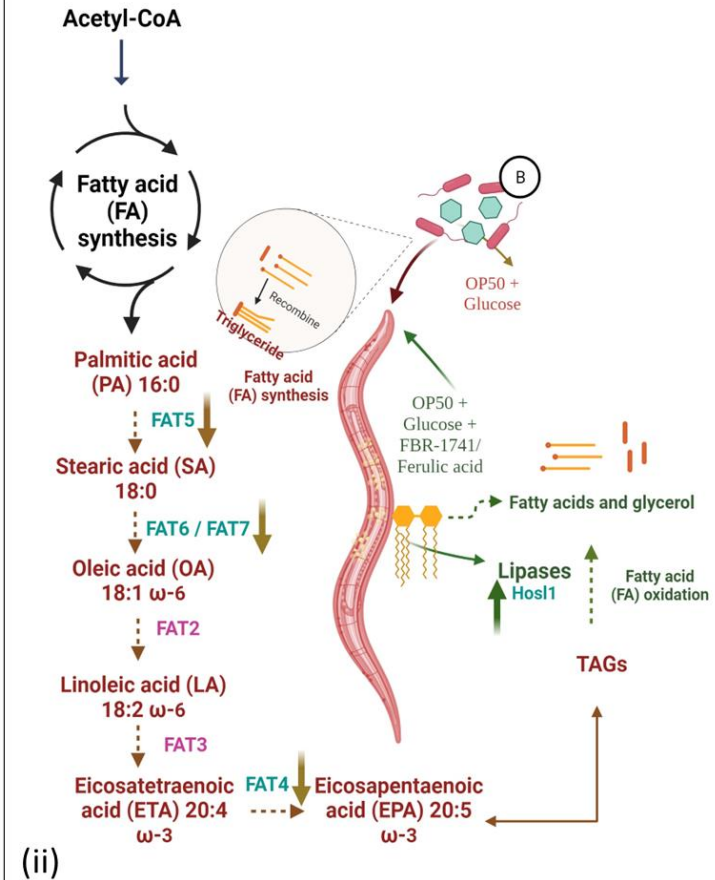

Supplementary Figure 5e. Formation and degradation of PUFA. Starting from the essential Fatty acids oleic acid, linoleic acid, and linolenic acid, the various (n-9)-, (n-6)- and (n-3)-PUFA are formed in sequential steps (at the level of CoA-ester); the Blue color line indicates *C. elegans* metabolomics identified metabolites (ii) Schematic representation highlighting the relationship between fatty acid synthesis and fatty acid oxidation in *C. elegans*, The FBR-1741 and Ferulic acid initiated the enzyme activities of implicated genes are indicated beside brown arrow, in red font to indicate that transcripts encoding that enzyme are downregulated with increasing life span, or in green to show upregulation. Lipids increase in melting temperature with increasing chain length and/or saturation level; thus, shift toward shorter chains with less desaturation, as seen in long-lived *C. elegans*.

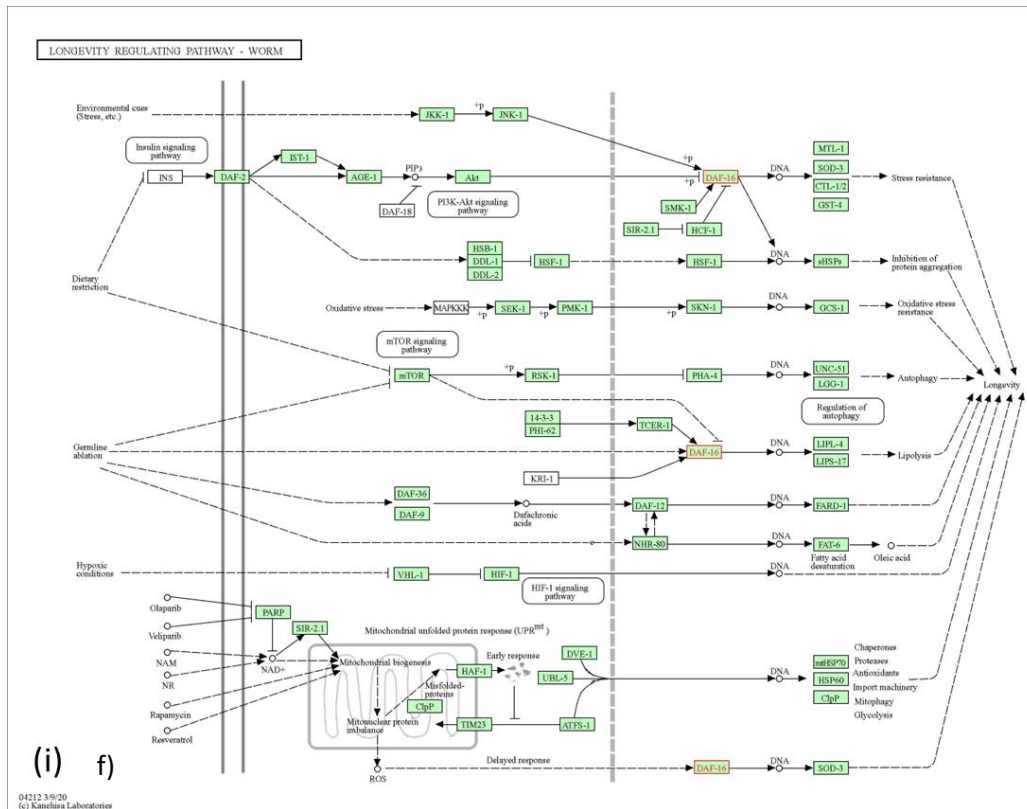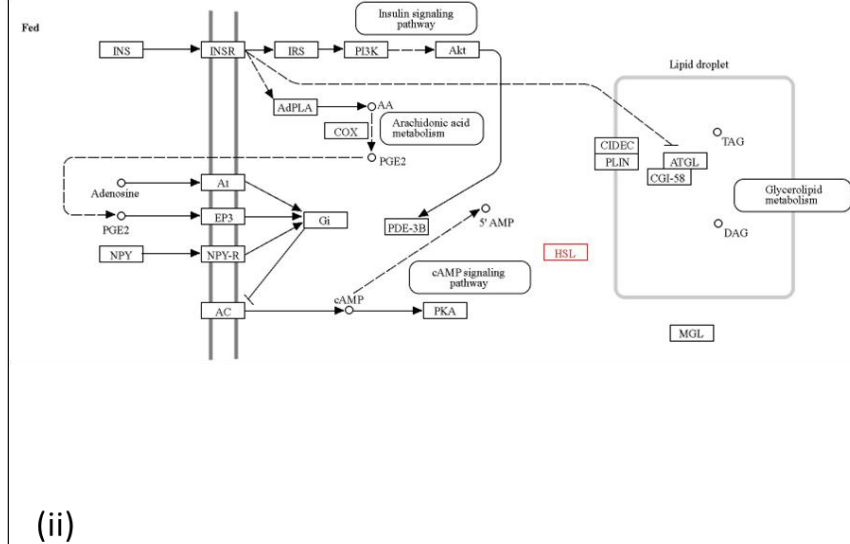

Supplementary Figure 5f. The nematode *Caenorhabditis elegans* has 70 genes that have been found to influence lifespan in this worm. Lifespan extension via Dietary restriction (FBR-1741), germline and other conditions depends on at least four signaling mechanisms: reduced TOR signaling, DAF-16/FOXO regulation, increased steroid signaling via the DAF-36/DAF-9/DAF-12 pathway, and increased NHR-80/HNF-4 signaling; (ii) Lipolysis in adipocytes, the hydrolysis of triacylglycerol (TAG) to release fatty acids (FAs) and glycerol for use by other organs as energy substrates, is a unique function of white adipose tissue. Lipolysis is under tight hormonal control. PKA phosphorylates target proteins such as hormone-sensitive lipase (HSL) and perilipin 1 (PLIN). PLIN phosphorylation is a key event in the sequential activation of TAG hydrolysis involving adipose triglyceride lipase (ATGL), HSL, and monoglyceride lipase (MGL). During the FBR-1741 and Ferulic acid-fed state, insulin, through activation of phosphodiesterase-3B (PDE-3B), inhibits catecholamine-induced lipolysis via the degradation of cAMP.
